# Supplementary material for: The acceleration of BODIPY dye-sensitized photocatalytic hydrogen production in aqueous ascorbic acid solutions using alkyl-chain formed second coordination sphere effects
Source: Royal Society of Chemistry journal article supplement (doi:10.1039/d3ta03682k), 2023-01-01
Supplement: d3ta03682k1.pdf [file d3ta03682k1.pdf]

## Supporting Information

### Acceleration of BODIPY dye-sensitized photocatalytic hydrogen production in aqueous ascorbic acid solutions using alkyl-chain formed second coordination sphere effects

Xiao-Feng Shen <sup>a</sup>, Motonori Watanabe <sup>a,b,c,d\*</sup>, Jun Tae Song <sup>b,d</sup>, Atsushi Takagaki <sup>e</sup>, Tatsuki Abe <sup>f</sup>, Keiji Tanaka <sup>a,b,d,f</sup>, Tatsumi Ishihara <sup>a,b,c,d</sup>

- a. Department of Automotive Science, Graduate School of Integrated Frontier Sciences, Kyushu University, 744 Motooka, Nishi-ku, Fukuoka, 819-0395 (Japan).
- b. International Institute for Carbon-Neutral Energy Research (WPI-I2CNER), Kyushu University, 744 Motooka, Nishi-ku, Fukuoka, 819-0395 (Japan).
- c. Center for Energy Systems Design (CESD), Kyushu University, 744 Motooka, Nishi-ku, Fukuoka, 819-0395 (Japan).
- d. Department of Applied Chemistry, Faculty of Engineering, Kyushu University, 744 Motooka, Nishi-ku, Fukuoka, 819-0395 (Japan).
- e. Division of Materials and Chemical Engineering, Faculty of Engineering, Yokohama National University, 79-5 Tokiwadai, Hodogaya-ku, Yokohama, 240-8501 (Japan)
- f. *Center for Polymer Interface and Molecular Adhesion Science, Kyushu University, 744 Motooka, Nishi-ku, Fukuoka, 819-0395 (Japan).*

## Synthesis of materials

### 1-1. Synthesis of 5,5-difluoro-1,3,7,9-tetramethyl-10-(pyridin-4-yl)-5H-4l4,5l4-dipyrrolo [1,2-c:2',1'-f] [1,3,2]diazaborinine **3**

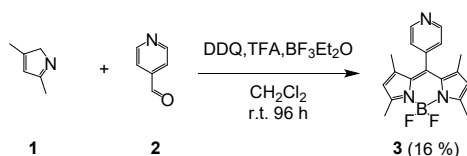

A solution of 3,5-dimethyl-2H-pyrrole **1** (4.9 g, 51.5 mmol) and 4-Pyridinecarboxaldehyde **2** (2.3 g, 21.5 mmol) in dichloromethane (150 mL) under a nitrogen atmosphere. After added Trifluoroacetic acid (TFA, 8 drops), the solution was heated to reflux for 96 h. Then, 2,3-dichloro-5,6-dicyano-p-benzoquinone (DDQ, 3.2 g, 14.1 mmol) was added, and the mixture was stirred for 1 h in ice bath.  $\text{NEt}_3$  (20.9 mL, 150 mmol), and  $\text{BF}_3 \cdot \text{Et}_2\text{O}$  (27.8 mL, 202.3 mmol) was added and stirred for 98 h at room temperature. After the reaction, the mixture was concentrated in vacuo. The crude product was purified by a silica gel chromatograph eluted with  $\text{CH}_2\text{Cl}_2$ /ethyl acetate (50:1) to give compound **3** (1.4 g, 19.6 %) as dark green solids.

$^1\text{H}$  (400 MHz,  $\text{CDCl}_3$ ) 1.41 (s, 6H), 2.56 (s, 6H), 6.01 (s, 2H), 7.32 (d,  $J=6.0$  Hz, 2H), 8.79 (d,  $J=5.9$  Hz, 2H).  $^{13}\text{C}$  (100 MHz,  $\text{CDCl}_3$ ) 14.6, 121.8, 123.4, 130.4, 137.6, 142.6, 143.7, 150.5, 156.5.

### 1-2. Synthesis of 4-(pentyloxy) phenol **6b**

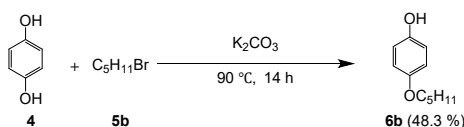

A solution of hydroquinone **4** (3.2 g, 29 mmol), potassium carbonate (10.0 g, 72 mmol) and 1-Bromopentane **5** (3.5 g, 23 mmol, 0.8 eq) in ethanol (80 mL), the solution was heated to reflux for 14 h. Then, ion-exchange water was added, the organic layer was dried by  $\text{Na}_2\text{SO}_4$ , crude product was purified by a silica gel chromatograph eluted with  $\text{CH}_2\text{Cl}_2$ /hexane (2:1) to give compound **6b** (2.0 g, 48.3 %).

$^1\text{H}$  NMR (400 MHz,  $\text{CDCl}_3$ ) 0.92 (t,  $J=7.1$  Hz, 3H), 1.29-1.48 (m, 4H), 1.68-1.85 (m, 2H), 3.89 (t,  $J=6.6$  Hz, 2H), 4.46 (s, 1H), 6.73-6.81 (m, 4H).  $^{13}\text{C}$  NMR (100 MHz,  $\text{CDCl}_3$ ) 14.04, 22.50, 28.20, 29.06, 69.00, 115.83, 116.24, 149.66, 152.97.

### 1-3. Synthesis of 4-(pentyloxy) phenol **6c**

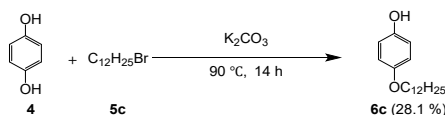

A solution of hydroquinone **4** (3.2 g, 29 mmol), potassium carbonate (10.0 g, 72 mmol) and 1-Bromododecane **5c** (5.7 g, 23 mmol, 0.8 eq) in ethanol (80 mL), the solution was heated to reflux for 14 h. Then, ion-exchange water was added, the organic layer was dried by  $\text{Na}_2\text{SO}_4$ , crude product was purified by a silica gel chromatograph eluted with  $\text{CH}_2\text{Cl}_2$ /hexane (2:1) to give compound **6c** (1.8 g, 28.1 %).

$^1\text{H}$  NMR (400 MHz,  $\text{CDCl}_3$ ) 0.90 (t,  $J=6.8$  Hz, 3H), 1.22-1.51 (m, 18H), 1.71-1.83 (m, 2H), 3.91 (t,  $J=6.6$  Hz, 2H), 4.58 (s,

1H), 6.73-6.83 (m, 4H). <sup>13</sup>C NMR (100 MHz, CDCl<sub>3</sub>) 14.10, 22.68, 26.05, 29.34, 29.41, 29.58, 29.63, 29.65, 31.91, 68.75, 115.63, 115.98, 149.33, 153.38.

#### 1-4. Synthesis of 1,3,7,9-tetramethyl-5,5-diphenoxy-10-(pyridin-4-yl)-5H-4l4,

##### 5l4-dipyrrolo[1,2-c:2',1'-f][1,3,2]diazaborinine **7a**

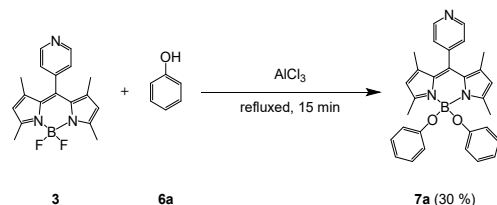

A solution of **3** (0.4 g, 1.2 mmol) and aluminum chloride (0.4 g, 2.5 mmol) in dried dichloromethane (20 mL) under a nitrogen atmosphere. The solution was heated to reflux for 15 minutes. After that, the mixture was cooled to room temperature, **6a** (0.4 g, 4.8 mmol) was added, and the mixture was stirred for 2 h. After the reaction, the mixture was concentrated in vacuo. The crude product was purified by a silica gel chromatograph eluted with dichloromethane to give compound **7a** (171 mg, 30 %).

<sup>1</sup>H NMR (400 MHz, CDCl<sub>3</sub>) 1.39 (s, 6H), 2.55 (s, 6H), 5.90 (s, 2H), 6.61 (d, J=8.1 Hz, 4H), 6.80 (t, J=7.2 Hz, 2H), 7.04-7.15 (m, 4H), 7.22 (d, J=5.1 Hz, 2H), 8.8 (d, J=4.4 Hz, 4H). <sup>13</sup>C NMR (100 MHz, CDCl<sub>3</sub>) 14.81, 15.29, 115.64, 118.72, 119.91, 122.56, 123.46, 129.57, 130.96, 137.75, 142.41, 143.69, 150.56, 156.51, 157.19.

#### 1-5. Synthesis of 1,3,7,9-tetramethyl-5,5-bis(4-(pentyloxy)phenoxy)-10-(pyridin-4-yl)-5H-4l4,

##### 5l4-dipyrrolo[1,2-c:2',1'-f][1,3,2]diazaborinine **7b**

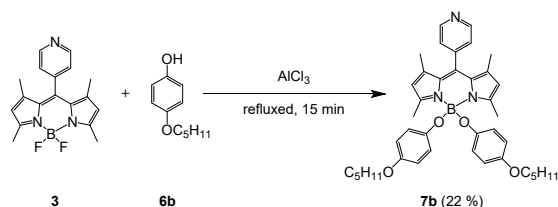

A solution of **3** (0.4 g, 1.2 mmol) and aluminum chloride (0.4 g, 2.5 mmol) in dried dichloromethane (20 mL) under a nitrogen atmosphere. The solution was heated to reflux for 15 minutes. After that, the mixture was cooled to room temperature, **6b** (0.8 g, 4.8 mmol) was added, and the mixture was stirred for 2 h. After the reaction, the mixture was concentrated in vacuo. The crude product was purified by a silica gel chromatograph eluted with dichloromethane to give compound **7b** (173 mg, 22 %).

<sup>1</sup>H NMR (400 MHz, CDCl<sub>3</sub>) 0.85-0.95 (m, 3H), 1.37-1.48 (m, 12H), 1.6-1.75 (m, 4H), 2.56 (s, 6H), 3.07-3.20 (m, 2H), 3.75-3.91 (m, 4H), 5.92 (s, 2H), 6.48 (d, J=7.7 Hz, 4H), 6.64 (d, J=7.7 Hz, 4H), 7.19 (s, 2H), 8.77 (s, 2H). <sup>13</sup>C NMR (100 MHz, CDCl<sub>3</sub>) 8.64, 14.01, 14.75, 15.27, 22.46, 28.25, 29.15, 45.98, 68.46, 115.03, 119.10, 122.40, 123.45, 130.94, 142.16, 150.34, 150.52, 152.59, 157.08.

**1-6. Synthesis of 5,5-bis(4-(dodecyloxy)phenoxy)-1,3,7,9-tetramethyl-10-(pyridin-4-yl)-5H-4,4,5,4-dipyrrolo[1,2-c:2',1'-f][1,3,2]diazaborinine **7c****

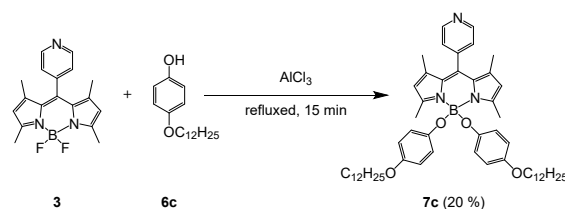

A solution of **3** (0.4 g, 1.2 mmol) and aluminum chloride (0.4 g, 2.5 mmol) in dried dichloromethane (20 mL) under a nitrogen atmosphere. The solution was heated to reflux for 15 minutes. After that, the mixture was cooled to room temperature, **6c** (1.3 g, 4.8 mmol) was added, and the mixture was stirred for 2 h. After the reaction, the mixture was concentrated in vacuo. The crude product was purified by a silica gel chromatograph eluted with dichloromethane to give compound **7c** (203 mg, 20 %).

$^1\text{H}$  NMR (400 MHz,  $\text{CDCl}_3$ ) 0.85-0.95 (m, 3H), 1.23-1.32 (m, 32H), 1.37-1.43 (m, 10H), 1.68-1.76 (m, 4H), 2.56 (s, 6H), 3.88 (t,  $J=6.6$  Hz, 4H), 5.91 (s, 2H), 6.48 (d,  $J=8.9$  Hz, 4H), 6.64 (d,  $J=8.9$  Hz, 4H), 7.19 (d,  $J=5.3$  Hz, 2H), 8.77 (d,  $J=5.3$  Hz, 2H).  $^{13}\text{C}$  NMR (100 MHz,  $\text{CDCl}_3$ ) 14.09, 14.75, 15.27, 22.67, 26.10, 29.33, 29.43, 29.48, 29.59, 29.65, 31.91, 68.48, 115.03, 119.09, 122.40, 123.41, 130.95, 143.70, 150.34, 150.57, 152.59, 157.09.

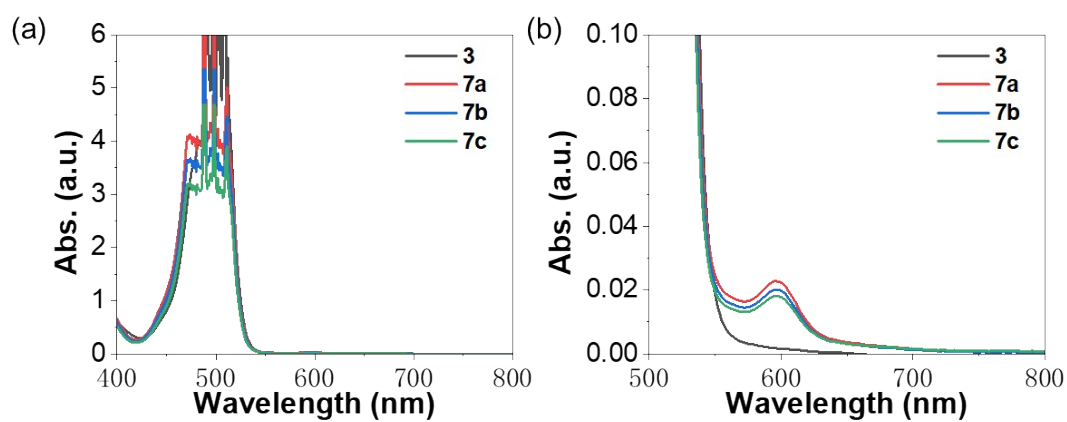

Fig. S1 UV-vis absorption spectra of dye in THF solution ( $2 \times 10^{-4}$  M): (a) full spectra; (b) The enlarged plot between 500-800 nm.

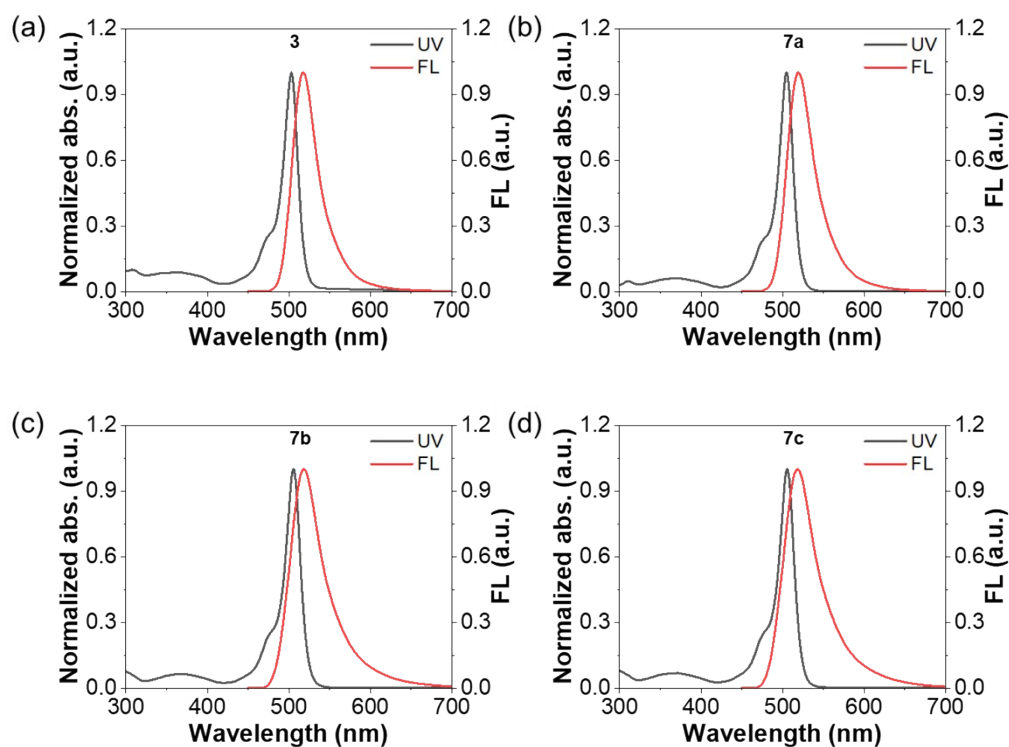

Fig. S2 UV and FL spectra of dye in THF solution: (a) 3; (b) 7a; (c) 7b; (d) 7c.

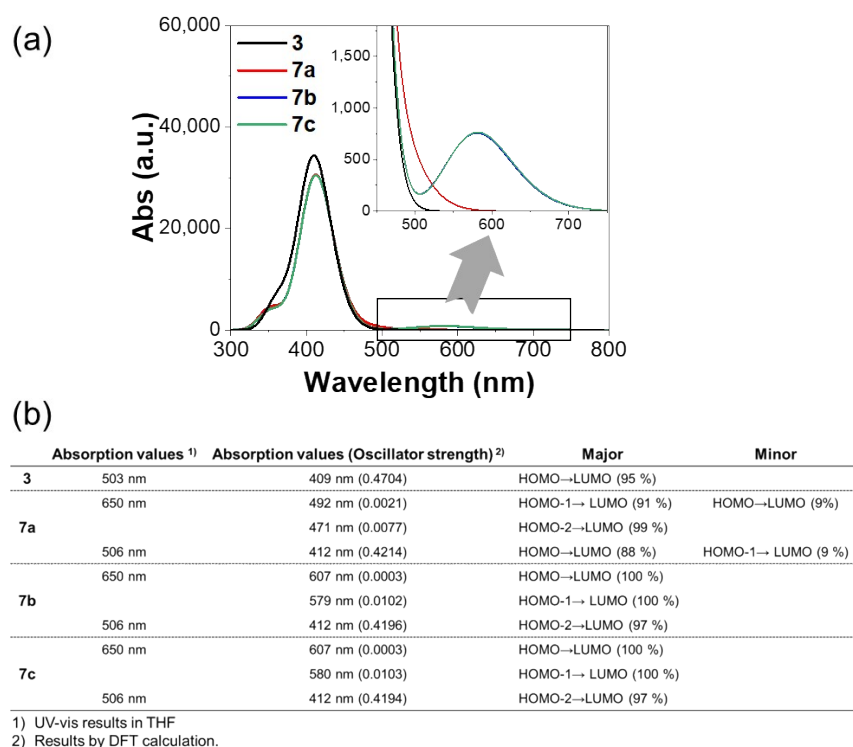

Fig. S3 (a) TD-DFT calculated absorption spectra of **3** and **7a-7c** (b) Values of absorption (experimental and theoretical), and molecular orbital contributions to electronic transitions of **3** and **7a-7c**.

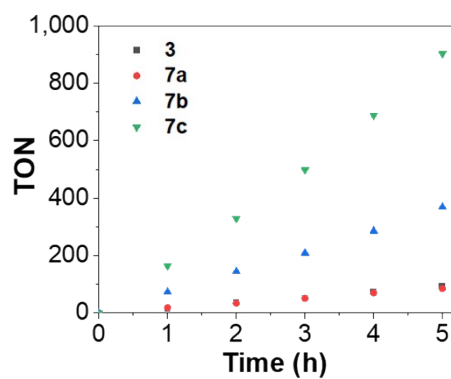

Fig. S4 Turnover number (TON) of the hydrogen production for **3** and **7a-7c** /Pt-TiO<sub>2</sub>. Conditions: 0.57 M ascorbic acid (pH = 4), Xe lamp (0.15 W cm<sup>-2</sup>, >420 nm).

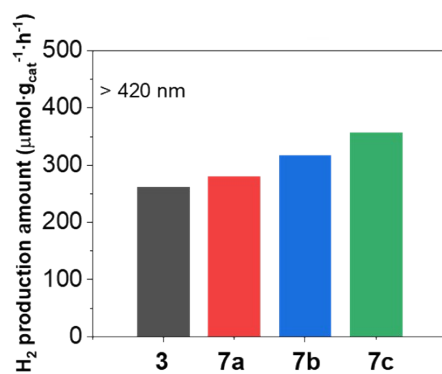

Fig. S5 Photocatalytic hydrogen production results of same loading amount (5.0 μmol/g) **3** and **7a-7c** /Pt-TiO<sub>2</sub> in ascorbic acid solution. Conditions: 0.57 M ascorbic acid (pH = 4), Xe lamp (0.08 W cm<sup>-2</sup>, >420 nm)

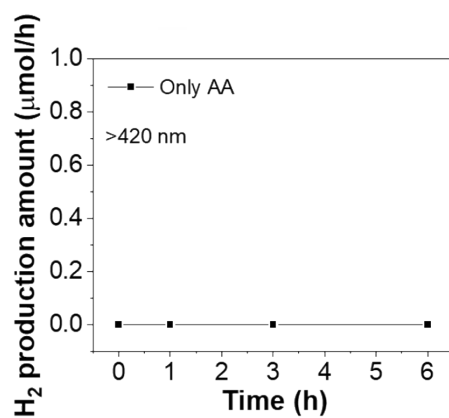

Fig. S6 Photocatalytic hydrogen production results of without photocatalyst. Conditions: 0.57 M ascorbic acid (pH = 4), Xe lamp (0.15 W cm<sup>-2</sup>, >420 nm).

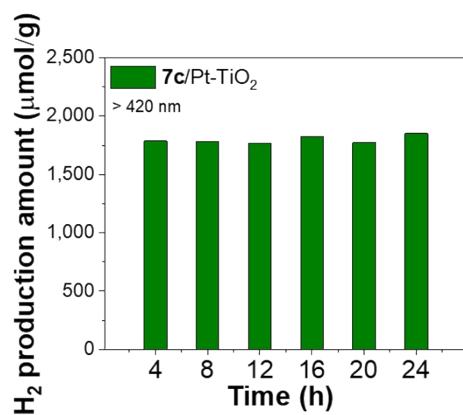

Fig. S7 Cycle stability test of **7c** /Pt-TiO<sub>2</sub>. Conditions: Xe lamp (0.15 W cm<sup>-2</sup>, >420 nm), 0.57 M ascorbic acid aq. (pH 4.0).

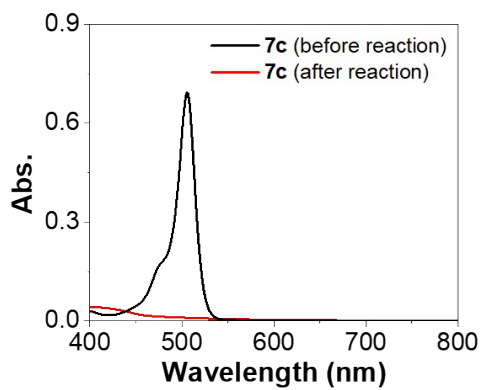

Fig. S8 UV-vis absorption spectrum of (black) **7c** in chloroform solution, and (red) spectrum on the chloroform solution side, where the aqueous solution after the reaction is extracted with chloroform



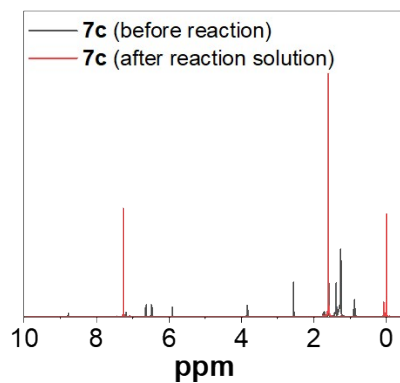

Fig. S9  $^1\text{H}$  NMR spectrum of (black) **7c** in  $\text{CDCl}_3$  solution, and (red) spectrum on the  $\text{CDCl}_3$  solution side, where the aqueous solution after the reaction is extracted with  $\text{CDCl}_3$ .

Table S1. AQY results of dye-sensitized photocatalyst

|                                                      | AQY           | Reaction time<br>(Reduction rate of activity) |           |
|------------------------------------------------------|---------------|-----------------------------------------------|-----------|
| <b>BBT</b> /Pt-TiO <sub>2</sub>                      | 0.4 % 650 nm  | 7 h <sup>a)</sup>                             | [1]       |
| <b>Zn- tri -PcNc</b> /gC <sub>3</sub> N <sub>4</sub> | 0.5 % 660 nm  | 10 h <sup>b)</sup>                            | [2]       |
| <b>ZnPyd</b> /Pt-C <sub>3</sub> N <sub>4</sub>       | 1.1 % 635 nm  | 30 h (-12%) <sup>a)</sup>                     | [3]       |
| <b>1</b> @SWCNT/fullerodendron                       | 1.4 % 650 nm  | 21 h (-66%) <sup>a)</sup>                     | [4]       |
| <b>7c</b> /Pt-TiO <sub>2</sub>                       | 1.4 % 650 nm  | 24 h <sup>a)</sup>                            | This work |
| <b>1</b> /Pt-HPT (TiO <sub>2</sub> )                 | 3.6 % 670 nm  | 30 h (-22%) <sup>a)</sup>                     | [5]       |
| <b>SA1</b> /Pt-TiO <sub>2</sub>                      | 12.5 % 650 nm | 30 h (-10%) <sup>a)</sup>                     | [6]       |

a) >420 nm

b) >500 nm

- 1 H. J. Hou, X. H. Zhang, D. K. Huang, X. Ding, S. Y. Wang, X. L. Yang, S. Q. Li, Y. G. Xiang and H. Chen, *Appl. Catal. B Environ.*, 2017, **203**, 563–571.
- 2 L. Yu, X. Zhang, C. Zhuang, L. Lin, R. Li and T. Peng, *Phys. Chem. Chem. Phys.*, 2014, **16**, 4106–4114.
- 3 J. Wang, D. Liu, Q. Liu, T. Peng, R. Li and S. Zhou, *Appl. Surf. Sci.*, 2019, **464**, 255–261.
- 4 N. Murakami, H. Miyake, T. Tajima, K. Nishikawa, R. Hirayama and Y. Takaguchi, *J. Am. Chem. Soc.*, 2018, **140**, 3821–3824.
- 5 O. Suryani, Y. Higashino, H. Sato and Y. Kubo, *ACS Appl. Energy Mater.*, 2019, **2**, 448–458.
- 6 X. -F. Shen, M. Watanabe, A. Takagaki, J. T. Song, T. Abe, D. Kawaguchi, K. Tanaka and T. Ishihara, *Appl. Phys. A Mater. Sci. Process.*, 2023, **129**, 28.

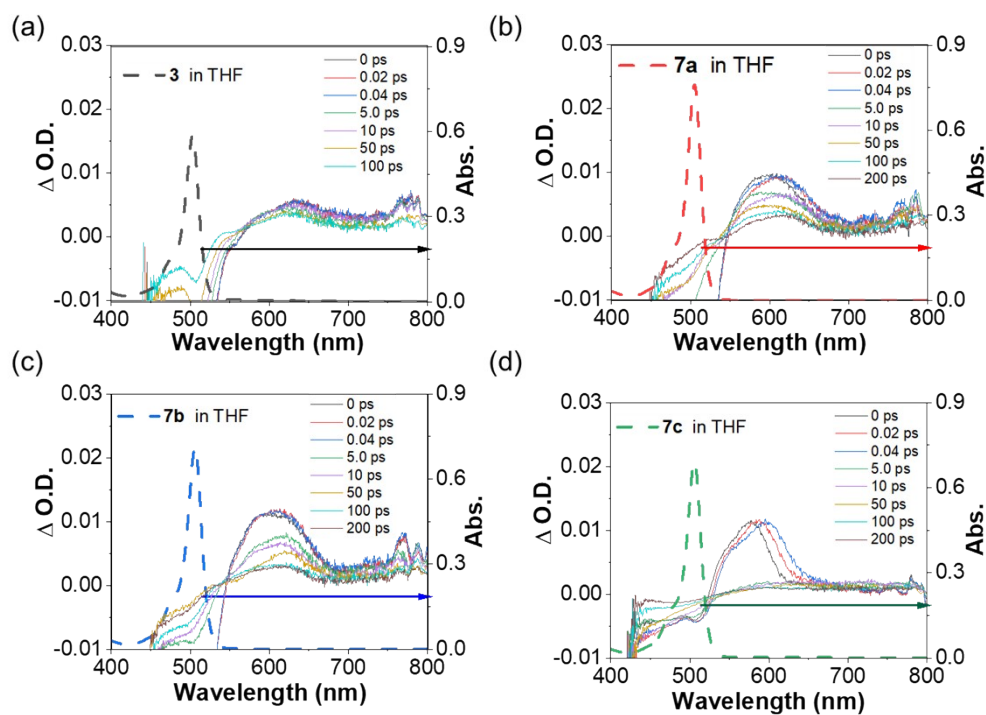

Fig. S10 Time-resolved absorption spectra of **3** and **7a-7c** /TiO<sub>2</sub> in 0.57 M ascorbic acid aq. (pH 4.0) for excitation at 400 nm in the 0–200 ps temporal window : (a) **3**; (b) **7a**; (c) **7b**; (d) **7c**.

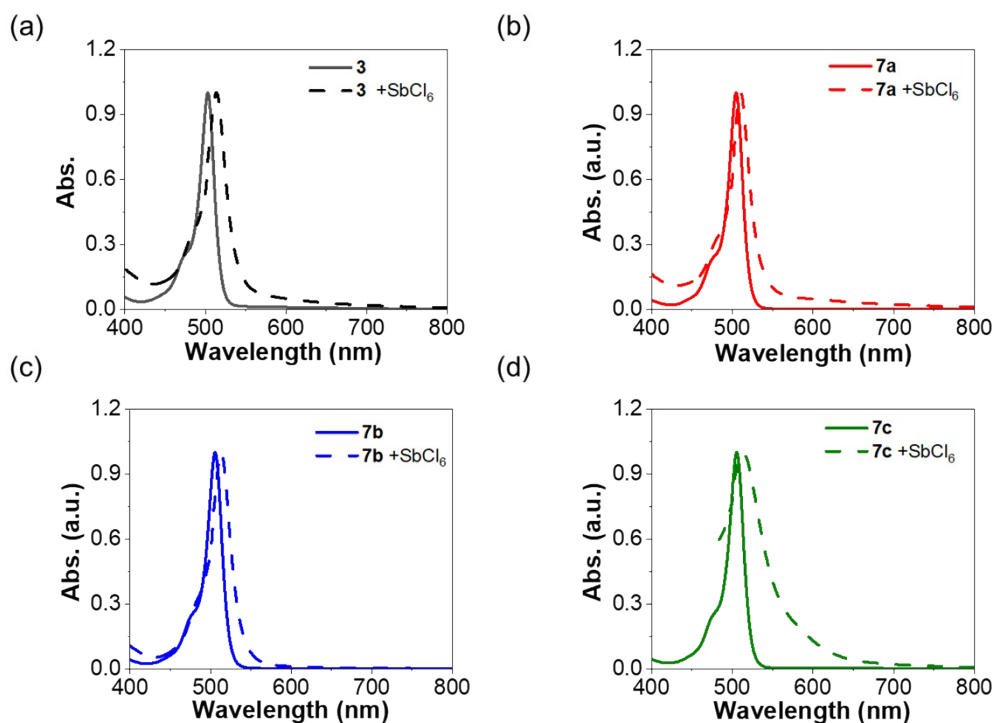

Fig. S11 UV-vis absorption spectra of **dye** and after added SbCl<sub>6</sub> in **dye** THF solution: (a) **3**; (b) **7a**; (c) **7b**;

(d) 7c.

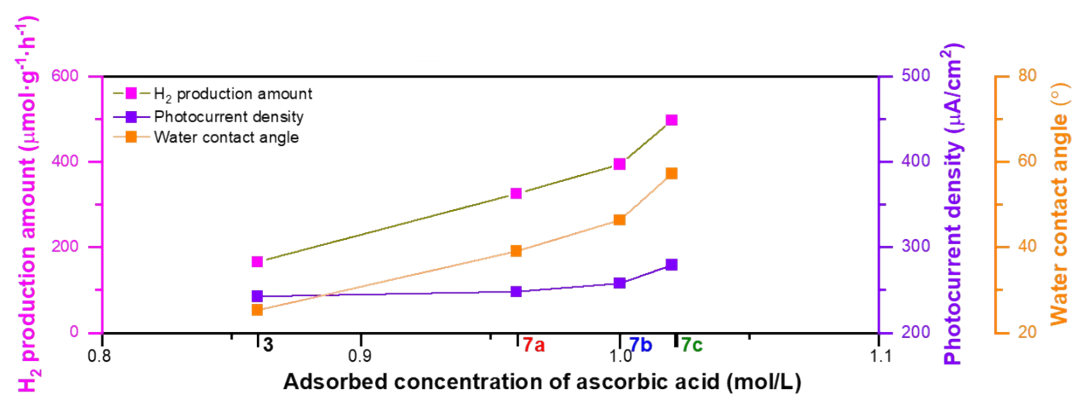

Fig. S12 The relationship between hydrophobicity, photocatalytic activity, photocurrent density and zeta potential differences with ascorbic acid.

Table S2. Different properties of dyes

|                                                                            | <b>3</b>            | <b>7a</b>           | <b>7b</b>           | <b>7c</b>           |
|----------------------------------------------------------------------------|---------------------|---------------------|---------------------|---------------------|
| Water contact angle (°)                                                    | 25.3                | 39.1                | 46.4                | 57.2                |
| TOF ( $\cdot\text{h}^{-1}$ )                                               | 18.6                | 19.0                | 73.8                | 180.5               |
| Photocurrent density ( $\mu\text{A}\cdot\text{cm}^{-2}$ )                  | 242.8               | 248.3               | 257.9               | 279.3               |
| Impedance ( $\Omega\cdot\text{cm}^{-2}$ )                                  | 74.4                | 77.3                | 88.3                | 106.1               |
| Zeta potential (mV)                                                        | -0.3 <sup>a)</sup>  | -2.4 <sup>a)</sup>  | -3.1 <sup>a)</sup>  | -15.3 <sup>a)</sup> |
|                                                                            | -10.5 <sup>b)</sup> | -13.6 <sup>b)</sup> | -14.5 <sup>b)</sup> | -15.2 <sup>b)</sup> |
| Adsorbed concentration of ascorbic acid ( $\text{mol}\cdot\text{L}^{-1}$ ) | 0.86 <sup>b)</sup>  | 0.96 <sup>b)</sup>  | 1.00 <sup>b)</sup>  | 1.02 <sup>b)</sup>  |
| $\tau_1$ (ns)                                                              | 84.3                | 13.9                | 8.3                 | 0.14                |
| $\tau_2$ (ns)                                                              | 667.3               | 356.6               | 144.1               | 29.0                |

a) Saturated loaded amount (amount: please see the main text) in water

b) Same loaded amount ( $5\ \mu\text{mol}\cdot\text{g}^{-1}$ ) in ascorbic acid

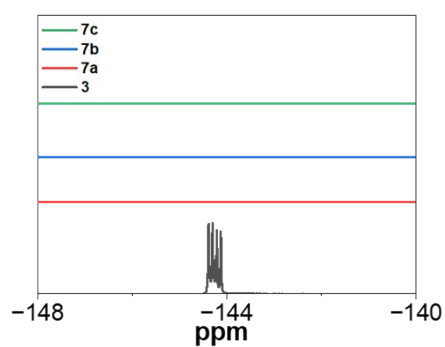Fig. S13  $^{19}\text{F}$  NMR spectra of **3**, **7a**, **7b** and **7c**.

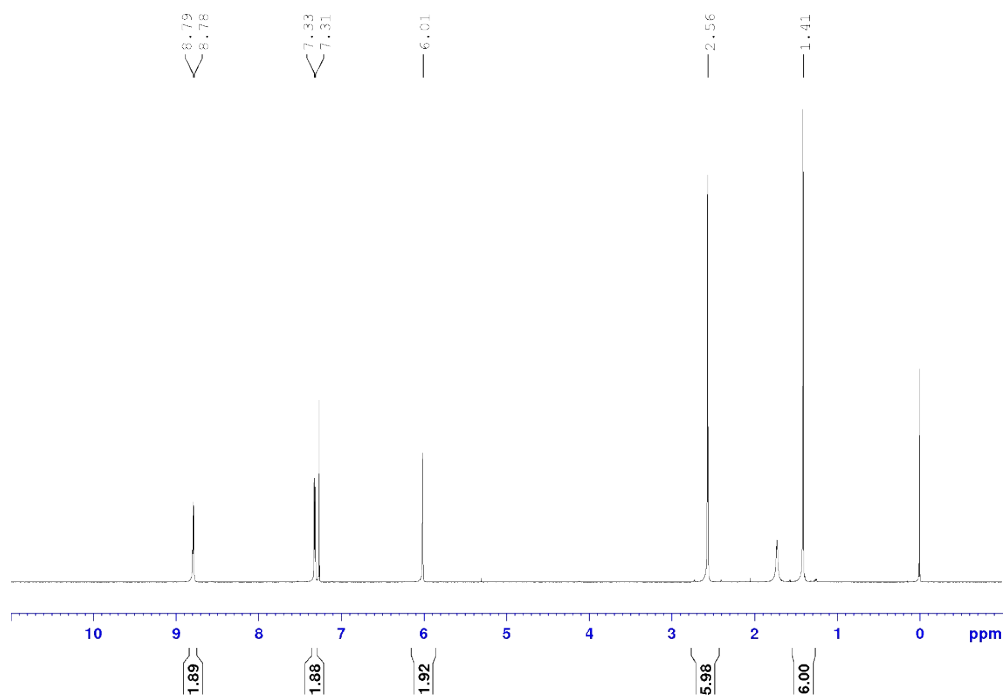

Fig. S14  $^1\text{H}$  NMR spectra of **3** (400 MHz).

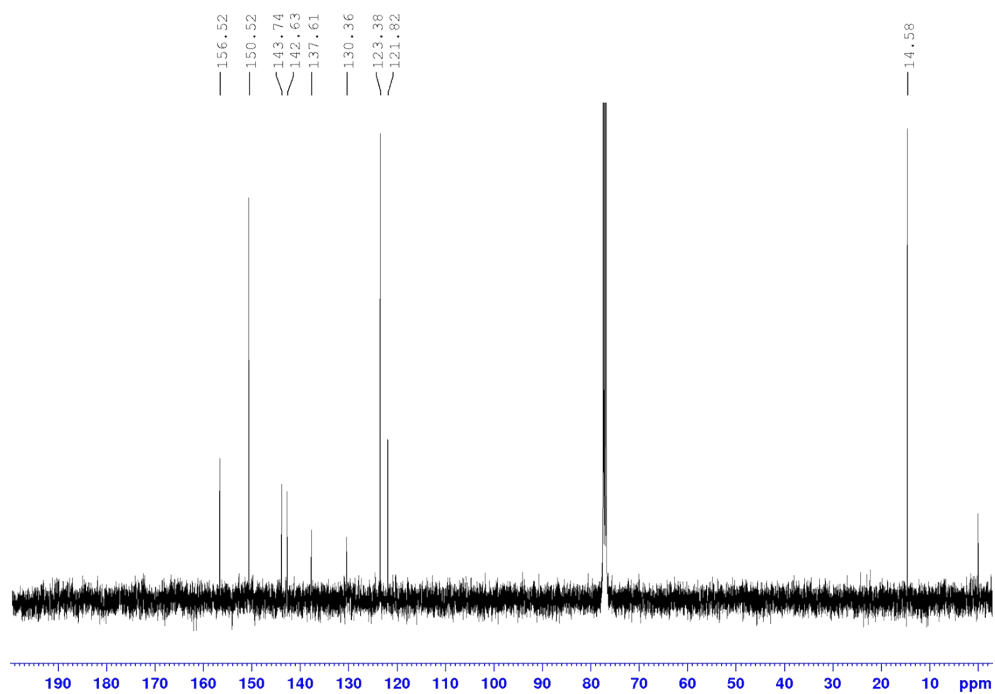

Fig. S15  $^{13}\text{C}$  NMR spectra of **3** (100 MHz).

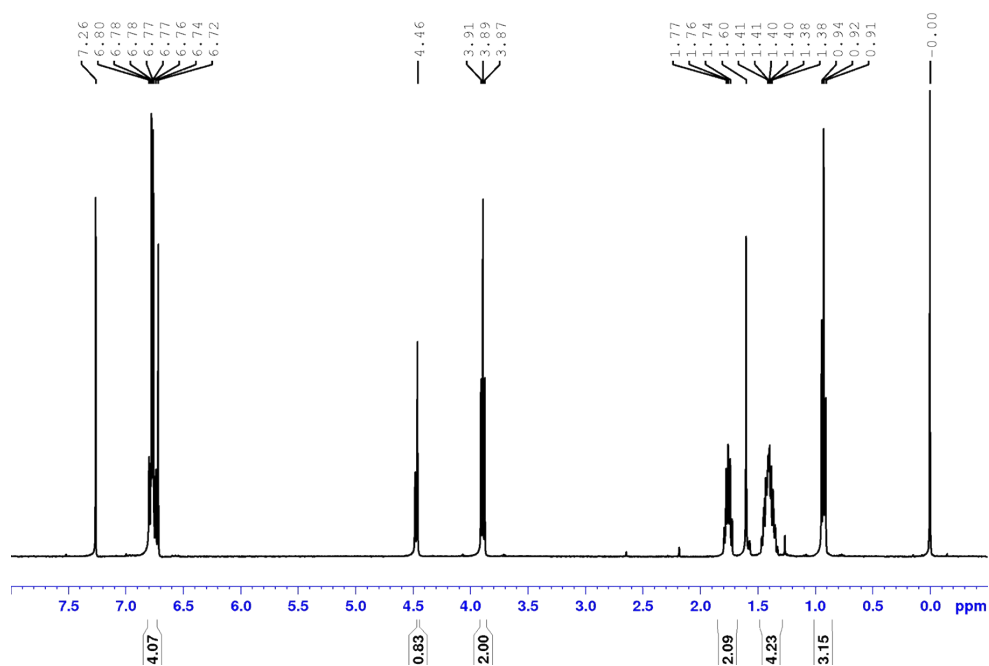

Fig. S16  $^1\text{H}$  NMR spectra of **6b** (400 MHz).

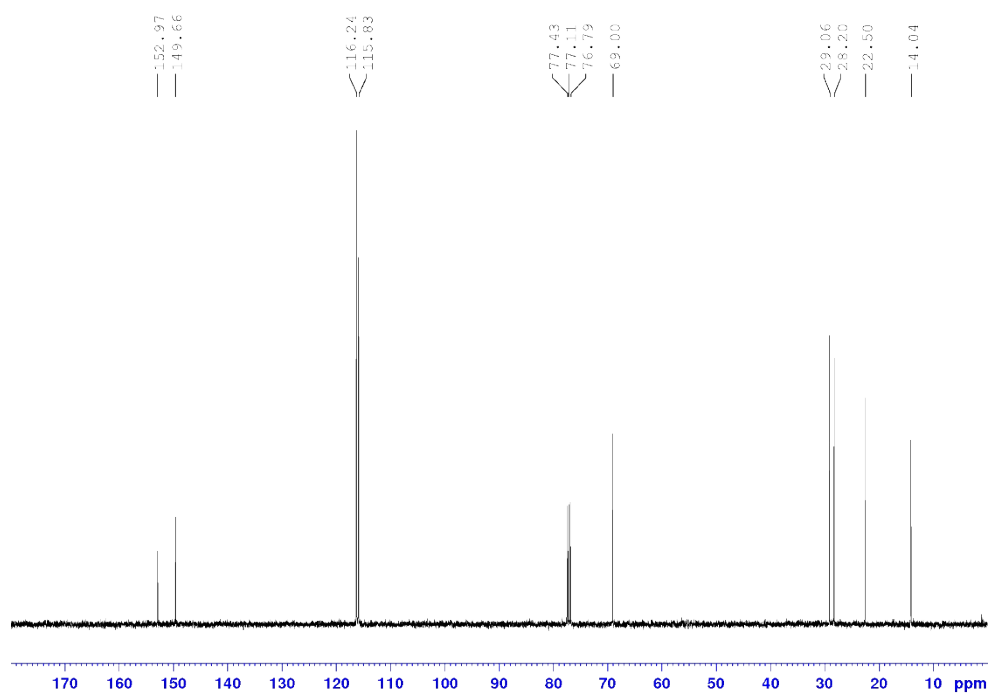

Fig. S17  $^{13}\text{C}$  NMR spectra of **6b** (100 MHz).

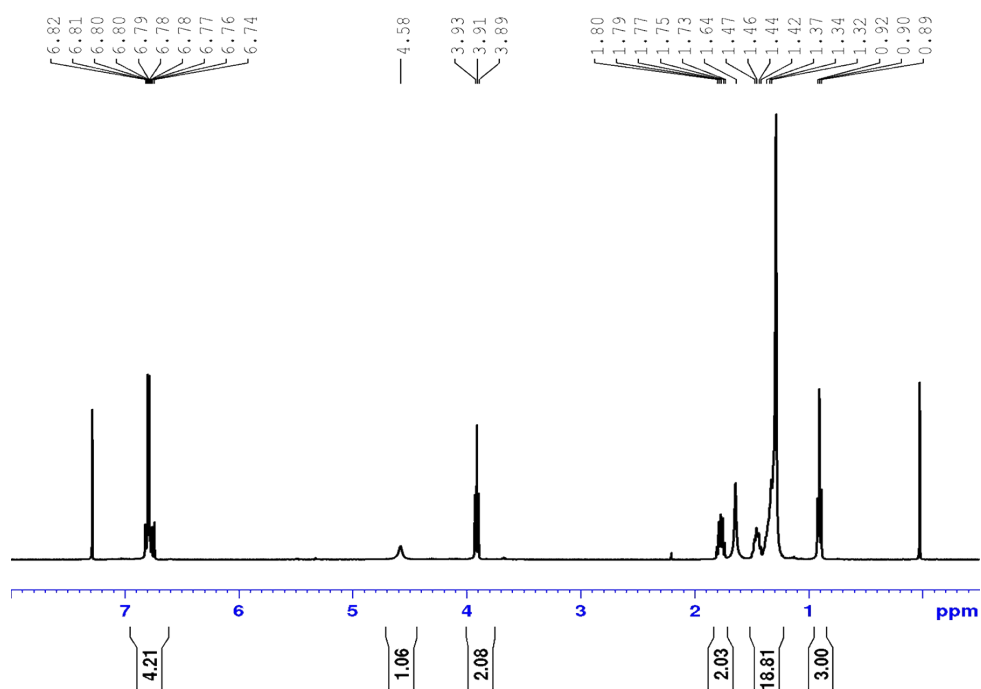

Fig. S18 <sup>1</sup>H NMR spectra of **6c** (400 MHz).

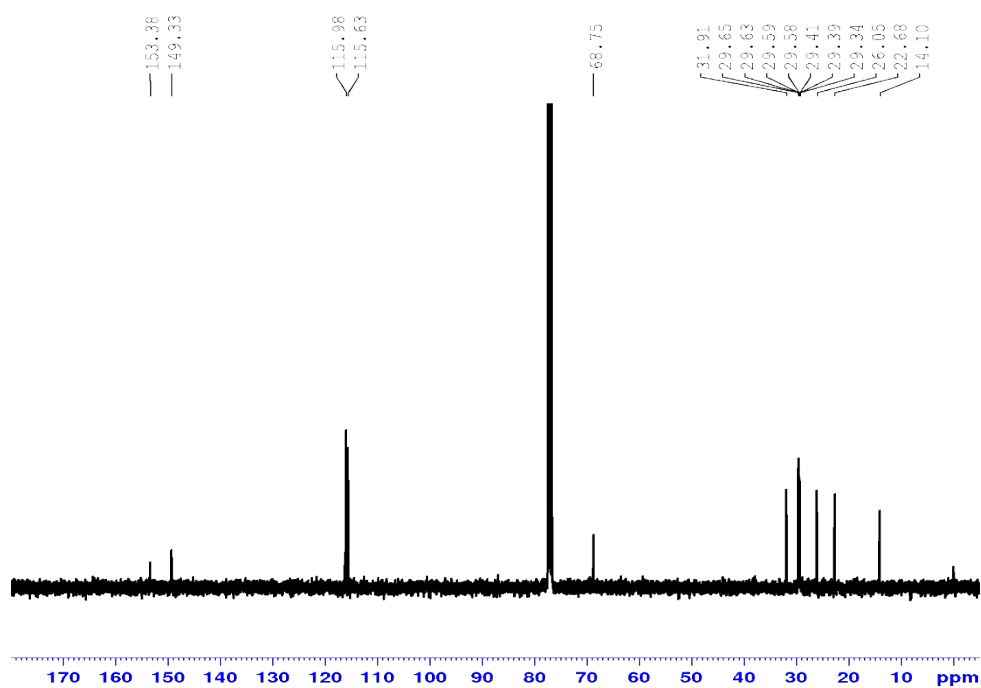

Fig. S19 <sup>13</sup>C NMR spectra of **6c** (100 MHz).



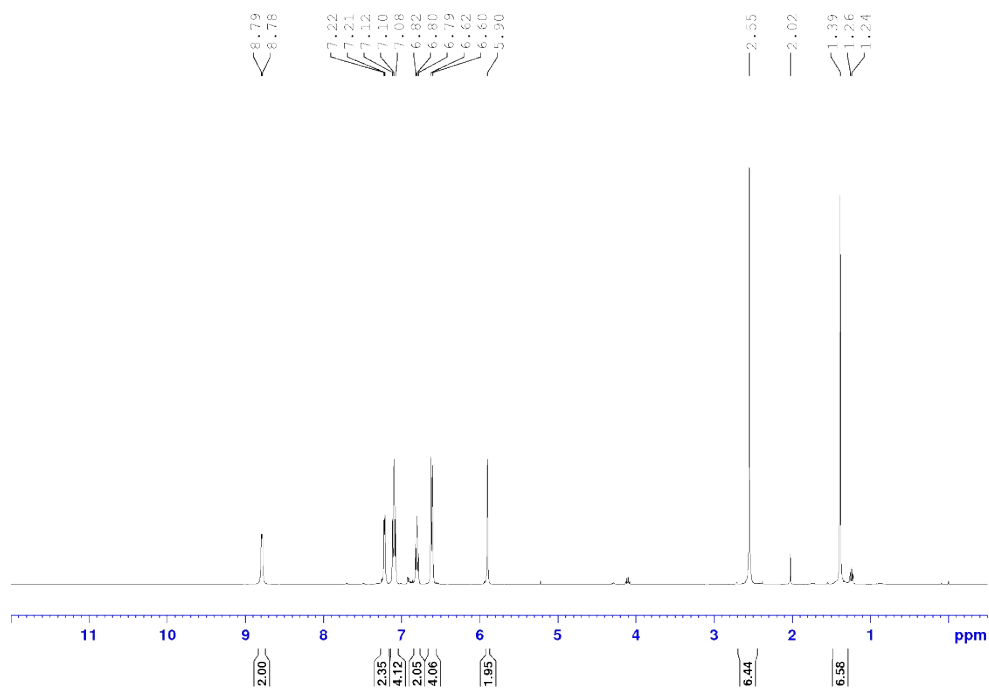

Fig. S20  $^1\text{H}$  NMR spectra of **7a** (400 MHz).

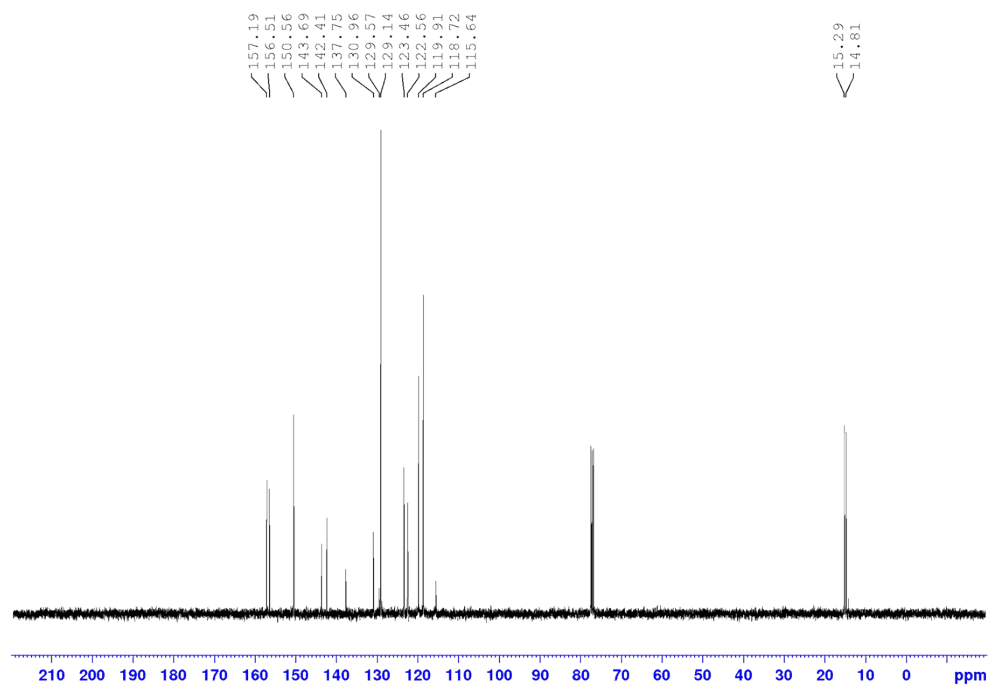

Fig. S21  $^{13}\text{C}$  NMR spectra of **7a** (100 MHz).

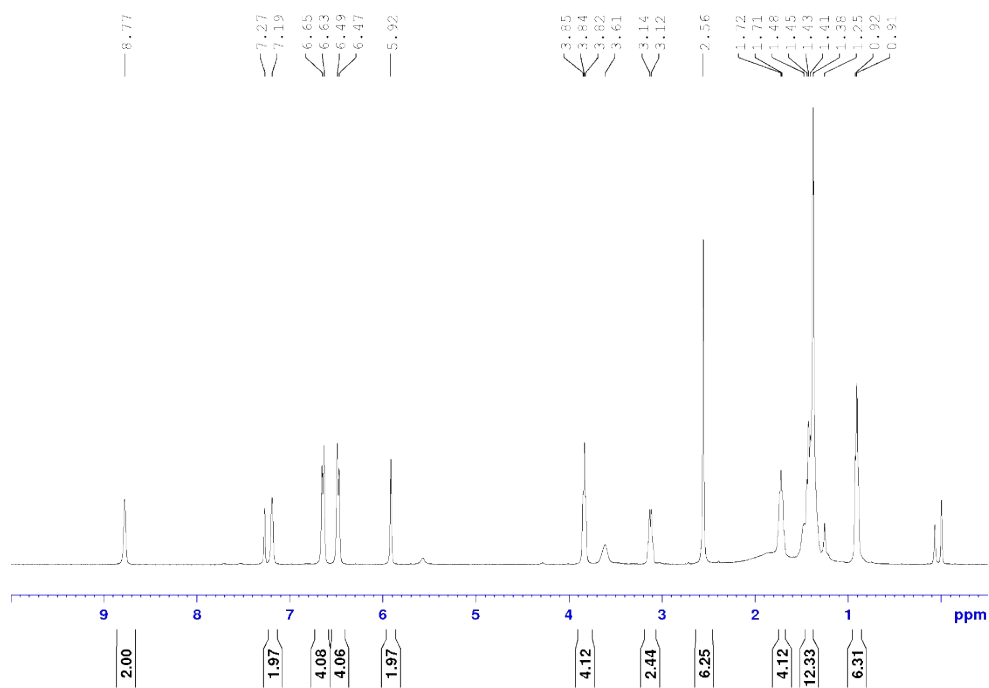

Fig. S22 <sup>1</sup>H NMR spectra of **7b** (400 MHz).

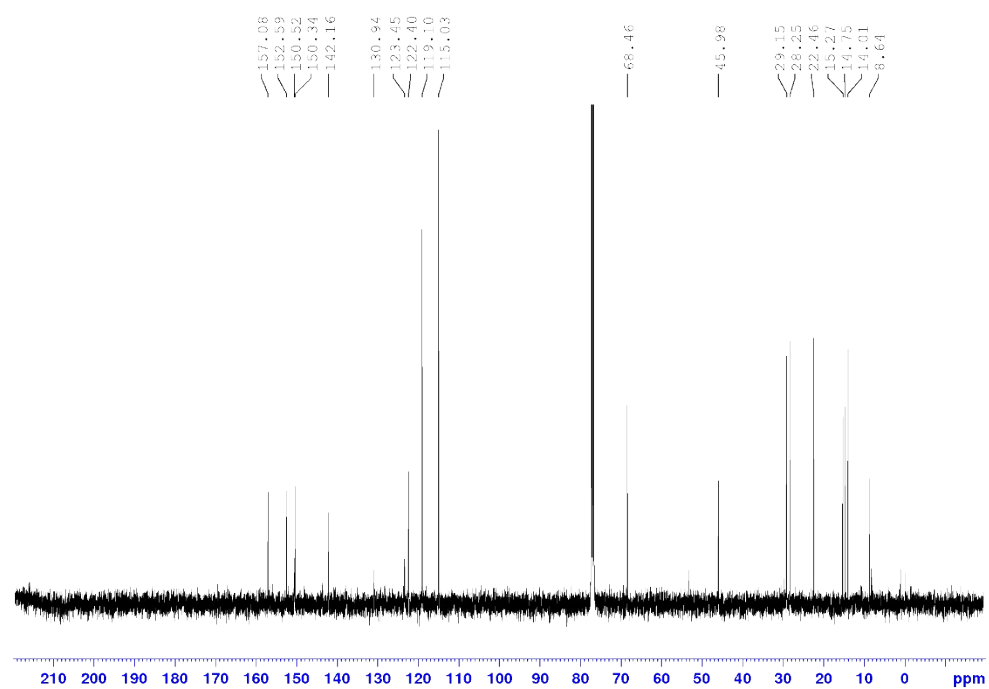

Fig. S23 <sup>13</sup>C NMR spectra of **7b** (100 MHz).

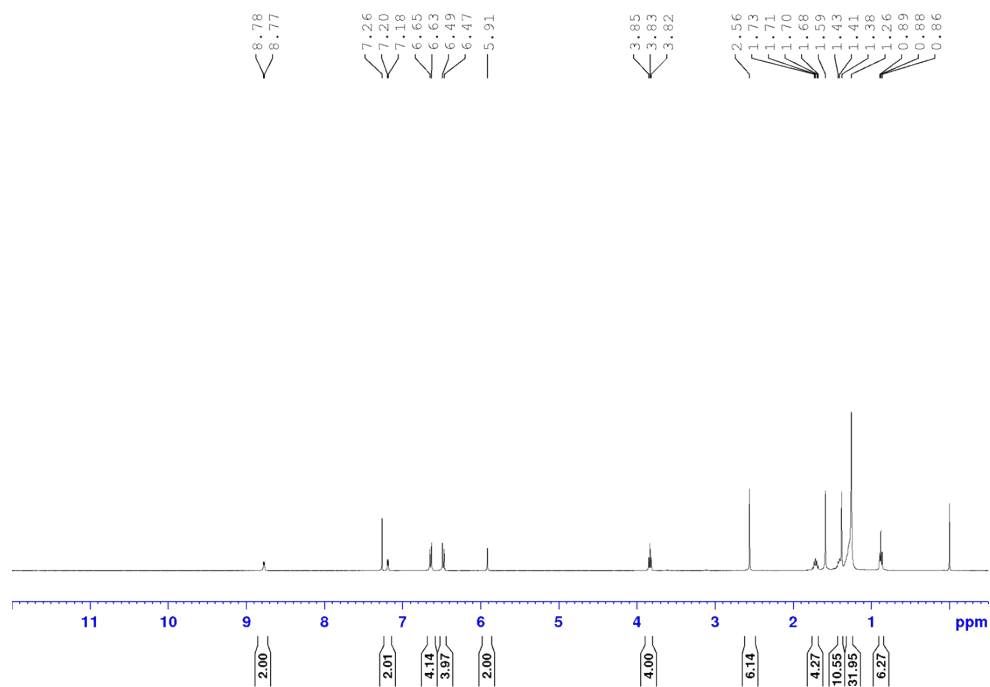

Fig. S24 <sup>1</sup>H NMR spectra of **7c** (400 MHz).

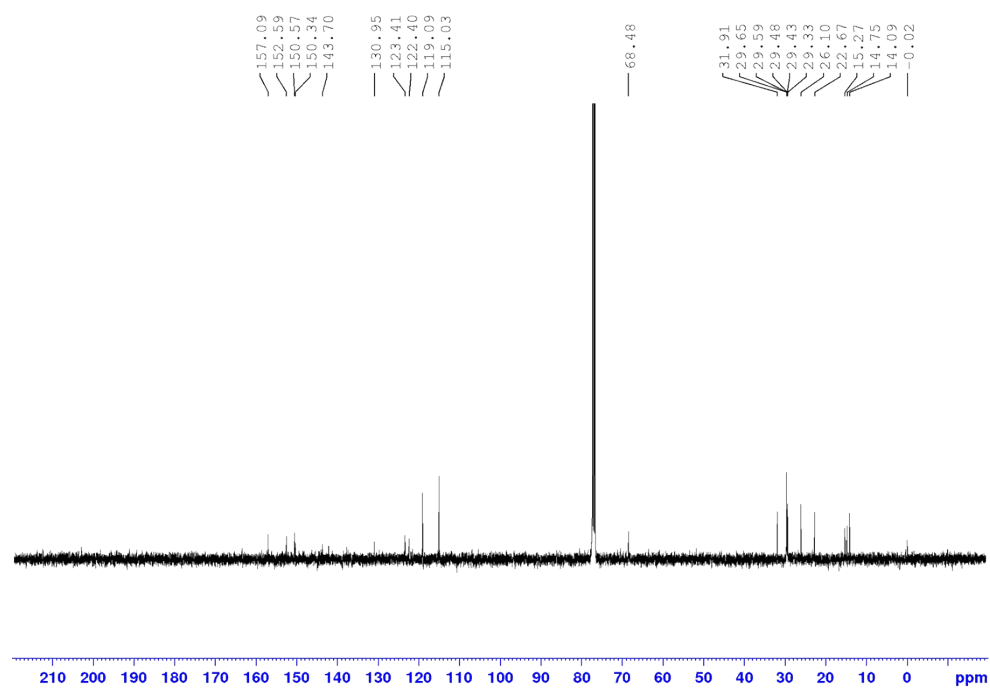

Fig. S25 <sup>13</sup>C NMR spectra of **7c** (100 MHz).
